# Supplementary material for: B7-H3-Targeted CAR-T Cells Exhibit Potent Antitumor Effects on Hematologic and Solid Tumors
Source: PubMed Central journal article supplement — Mol Ther Oncolytics. 2020 Apr 7;17:180–9. doi: 10.1016/j.omto.2020.03.019 (PMC7178328; doi:10.1016/j.omto.2020.03.019), 2020-04-07
Supplement: mmc1.pdf [file mmc1.pdf]

**OMTO, Volume 17**

## **Supplemental Information**

### **B7-H3-Targeted CAR-T Cells**

#### **Exhibit Potent Antitumor Effects**

#### **on Hematologic and Solid Tumors**

**Zongliang Zhang, Caiying Jiang, Zhiyong Liu, Meijia Yang, Xin Tang, Yuelong Wang, Meijun Zheng, Jianhan Huang, Kunhong Zhong, Shasha Zhao, Mei Tang, Tingyue Zhou, Hui Yang, Gang Guo, Liangxue Zhou, Jianguo Xu, and Aiping Tong**

**Table S1. B7-H3 expression patterns in human tumour tissues analysed with IHC**

| Tumor Type            | #Stained | Positive (%) | Intensity |       |        |         |
|-----------------------|----------|--------------|-----------|-------|--------|---------|
|                       |          |              | - (%)     | + (%) | ++ (%) | +++ (%) |
| Bladder: BLCA         | 16       | 88           | 12        | 19    | 25     | 44      |
| Breast: BRCA          | 10       | 60           | 40        | 10    | 20     | 30      |
| Cervical: CESC        | 14       | 57           | 43        | 36    | 14     | 7       |
| Colorectal: COAD      | 16       | 44           | 56        | 12    | 19     | 13      |
| Esophageal: ESCA      | 9        | 89           | 11        | 11    | 11     | 67      |
| Stomach: STAD         | 8        | 63           | 37        | 13    | 25     | 25      |
| Kidney: KIRP          | 10       | 60           | 40        | 10    | 40     | 10      |
| Liver: LIHC           | 15       | 80           | 20        | 13    | 40     | 27      |
| Lung: LUSC            | 21       | 76           | 24        | 18    | 29     | 29      |
| Lymphoma: DLBC        | 7        | 71           | 29        | 42    | 29     | 0       |
| Skin: SSCC            | 20       | 80           | 20        | 15    | 15     | 50      |
| Ovarian: OV           | 11       | 64           | 36        | 27    | 18     | 19      |
| Pancreatic: PAAD      | 23       | 61           | 39        | 17    | 13     | 31      |
| Prostate: PRAD        | 18       | 50           | 50        | 11    | 6      | 33      |
| Testis: ANSE and SEMI | 5        | 20           | 80        | 20    | 0      | 0       |
| Testis: EMCA          | 4        | 100          | 0         | 50    | 50     | 0       |
| Tongue: ERMS          | 2        | 0            | 100       | 0     | 0      | 0       |
| Total tumor tissue:   | 209      | 66           | 34        | 18    | 21     | 27      |

Note: The expression levels were scored as no expression (-), < 20% positive cells (+, low or weak expression), 20-50% positive cells (++, moderate expression), and > 50% positive cells (+++, high or strong expression).

BLCA: Bladder Urothelial Carcinoma, BRCA: Breast invasive carcinoma, CESC: Cervical squamous cell carcinoma, COAD: Colon adenocarcinoma, ESCA: Esophageal carcinoma, STAD: Stomach adenocarcinoma, KIRC: Kidney renal clear cell carcinoma, LIHC: Liver hepatocellular carcinoma, LUSC: Lung squamous cell carcinoma, DLBC: Diffuse Large B-cell Lymphoma, SSCC: Skin squamous cell carcinoma, OV: Ovarian serous cystadenocarcinoma, PAAD: Pancreatic adenocarcinoma, PRAD: Prostate adenocarcinoma, ANSE: Anaplasia seminoma, SEMI: seminoma, EMCA: Embryonal carcinoma, ERMS: Embryonal rhabdomyosarcoma.

**Table S2. B7-H3 expression patterns in human TATs analysed with IHC**

| Tumor Type       | #Stained | Positive (%) | Intensity |       |        |         |
|------------------|----------|--------------|-----------|-------|--------|---------|
|                  |          |              | - (%)     | + (%) | ++ (%) | +++ (%) |
| Bladder (TAT)    | 16       | 19           | 81        | 19    | 0      | 0       |
| Breast (TAT)     | 10       | 10           | 90        | 10    | 0      | 0       |
| Cervical (TAT)   | 14       | 29           | 71        | 29    | 0      | 0       |
| Colorectal (TAT) | 16       | 63           | 38        | 44    | 19     | 0       |
| Esophageal (TAT) | 9        | 33           | 67        | 0     | 33     | 0       |
| Stomach (TAT)    | 8        | 63           | 38        | 13    | 25     | 0       |
| Kidney (TAT)     | 10       | 0            | 100       | 0     | 0      | 0       |
| Liver (TAT)      | 15       | 53           | 47        | 27    | 27     | 0       |
| Lung (TAT)       | 21       | 52           | 48        | 29    | 24     | 0       |
| Lymphoma (TAT)   | 7        | 29           | 71        | 14    | 0      | 0       |
| Skin (TAT)       | 20       | 55           | 45        | 25    | 30     | 0       |
| Ovarian (TAT)    | 11       | 45           | 55        | 27    | 18     | 0       |
| Pancreatic (TAT) | 23       | 35           | 65        | 17    | 17     | 0       |
| Prostate (TAT)   | 18       | 33           | 67        | 22    | 11     | 0       |
| Testis (TAT)     | 9        | 56           | 44        | 56    | 0      | 0       |
| Placenta (TAT)   | 2        | 100          | 0         | 0     | 100    | 0       |
| Total TAT:       | 209      | 84           | 125       | 23    | 16     | 0       |

Note: TAT: tumor adjacent tissues; The expression levels were scored as no expression (-), < 20% positive cells (+, low or weak expression), 20-50% positive cells (++, moderate expression), and > 50% positive cells (+++, high or strong expression).

**Table S3. B7-H3 expression patterns in human normal tissues analysed with IHC**

| Tumor Type          | #Stained | Positive (%) | Intensity |       |        |         |
|---------------------|----------|--------------|-----------|-------|--------|---------|
|                     |          |              | - (%)     | + (%) | ++ (%) | +++ (%) |
| Breast              | 5        | 20           | 80        | 20    | 0      | 0       |
| Cerebellum          | 8        | 0            | 100       | 0     | 0      | 0       |
| Cerebrum            | 8        | 13           | 87        | 13    | 0      | 0       |
| Esophagus           | 6        | 17           | 83        | 17    | 0      | 0       |
| Stomach             | 6        | 0            | 100       | 0     | 0      | 0       |
| Intestine           | 8        | 0            | 100       | 0     | 0      | 0       |
| Colon               | 4        | 25           | 75        | 25    | 0      | 0       |
| Heart               | 4        | 0            | 100       | 0     | 0      | 0       |
| Kidney              | 8        | 0            | 100       | 0     | 0      | 0       |
| Liver               | 12       | 67           | 33        | 42    | 25     | 0       |
| Lung                | 9        | 0            | 100       | 0     | 0      | 0       |
| Ovary               | 5        | 60           | 40        | 60    | 0      | 0       |
| Pancreas            | 6        | 17           | 83        | 17    | 0      | 0       |
| Prostate            | 8        | 38           | 62        | 25    | 13     |         |
| Skin                | 10       | 0            | 100       | 0     | 0      | 0       |
| Testis              | 4        | 50           | 50        | 50    | 0      | 0       |
| Thyroid             | 9        | 0            | 100       | 0     | 0      | 0       |
| Tonsils             | 5        | 20           | 80        | 20    | 0      | 0       |
| Uterus              | 7        | 43           | 57        | 14    | 29     | 0       |
| Adrenal gland       | 15       | 40           | 60        | 20    | 20     | 0       |
| Spleen              | 6        | 0            | 100       | 0     | 0      | 0       |
| Bladder             | 8        | 13           | 87        | 13    | 0      | 0       |
| Larynx              | 7        | 14           | 86        | 14    | 0      | 0       |
| Salivary gland      | 5        | 20           | 80        | 20    | 0      | 0       |
| Total tumor tissue: | 173      | 20           | 80        | 14    | 6      | 0       |

Note: The expression levels were scored as no expression (-), < 20% positive cells (+, low or weak expression), 20-50% positive cells (++, moderate expression), and > 50% positive cells (+++, high or strong expression).

**Table S4. Affinity analysis of mAb-J42 and J42-scFv-Fc with B7-H3-ECD-His**

| <b>Antibody</b> | <b>Ka (1/MS)</b>    | <b>Kd (1/s)</b>        | <b>KD(pM)</b> |
|-----------------|---------------------|------------------------|---------------|
| mAb-J42         | $5.619 \times 10^5$ | $3.729 \times 10^{-5}$ | 66.36         |
| J42-scFv-Fc     | $1.957 \times 10^5$ | $2.515 \times 10^{-5}$ | 128.5         |

Note: The binding affinity was measured using the Biacore<sup>TM</sup> X100 instrument with CM5 sensor chip (GE Healthcare). mAb-J42 and Fc-tagged J42-scFv were indirectly captured onto the surface, and the B7-H3-ECD-His protein was injected across the chip in a twofold dilution series. The equilibrium dissociation constant (KD) was obtained using BIAevaluation 2.0 software.

**Table S5. B7-H3 expression in tumor cell lines**

| <b>Cell line</b> | <b>Tumor type</b>            | <b>B7-H3</b> | <b>Cell line</b> | <b>Tumor type</b>         | <b>B7-H3</b> |
|------------------|------------------------------|--------------|------------------|---------------------------|--------------|
| A375             | melanoma                     | +            | SKOV3            | ovarian cancer            | +            |
| DU145            | prostate cancer              | +            | H1975            | lung cancer               | +            |
| SW480            | colon cancer                 | +            | MDA-MB-231       | breast cancer             | +            |
| 786-O            | renal cancer                 | +            | HepG2            | liver cancer              | +            |
| PANC-1           | pancreatic cancer            | +            | SiHa             | cervical cancer           | +            |
| U266             | multiple myeloma             | +            | THP-1            | monocytic leukemia        | +            |
| MV4-11           | B myelomonocytic<br>leukemia | +            | U937             | histiocytic<br>lymphoma   | +            |
| K562             | myelogenous leukemia         | +            | HL-60            | promyelocytic<br>leukemia | +            |
| Jurkat           | T cell leukemia              | -            | Raji             | Burkitt's lymphoma        | -            |
| Daudi            | Burkitt's lymphoma           | -            | Ramos            | Burkitt's lymphoma        | -            |

Note: +, positive; -, negative.

**Table S6. Characteristics of AML**

| <b>AML Sample ID</b> | <b>Age</b> | <b>Sex</b> | <b>Cytogenetics</b> | <b>B7-H3% positive</b> |
|----------------------|------------|------------|---------------------|------------------------|
| 1                    | 10 years   | male       | t(3;11), MLL-R      | 80.4                   |
| 2                    | 8 years    | male       | t(6;11), MLL-R      | 73.0                   |
| 3                    | 15 years   | female     | PML/RARA+           | 77.2                   |
| 4                    | 22 years   | male       | inv(3)(q21.3q26.2)  | 45.7                   |
| 5                    | 15 years   | male       | 46, XY              | 40.5                   |
| 6                    | 6 years    | male       | t(4;11), MLL-R      | 42.1                   |
| 7                    | 7 years    | female     | PML/RARA+           | 38.8                   |
| 8                    | 31 years   | male       | 46, XY              | 60.2                   |

Note: Bone marrow aspirates from patients with monocytic/myelomonocytic AML were obtained and subjected to flow cytometry assay.

## Fold Change Between Tumor and Normal

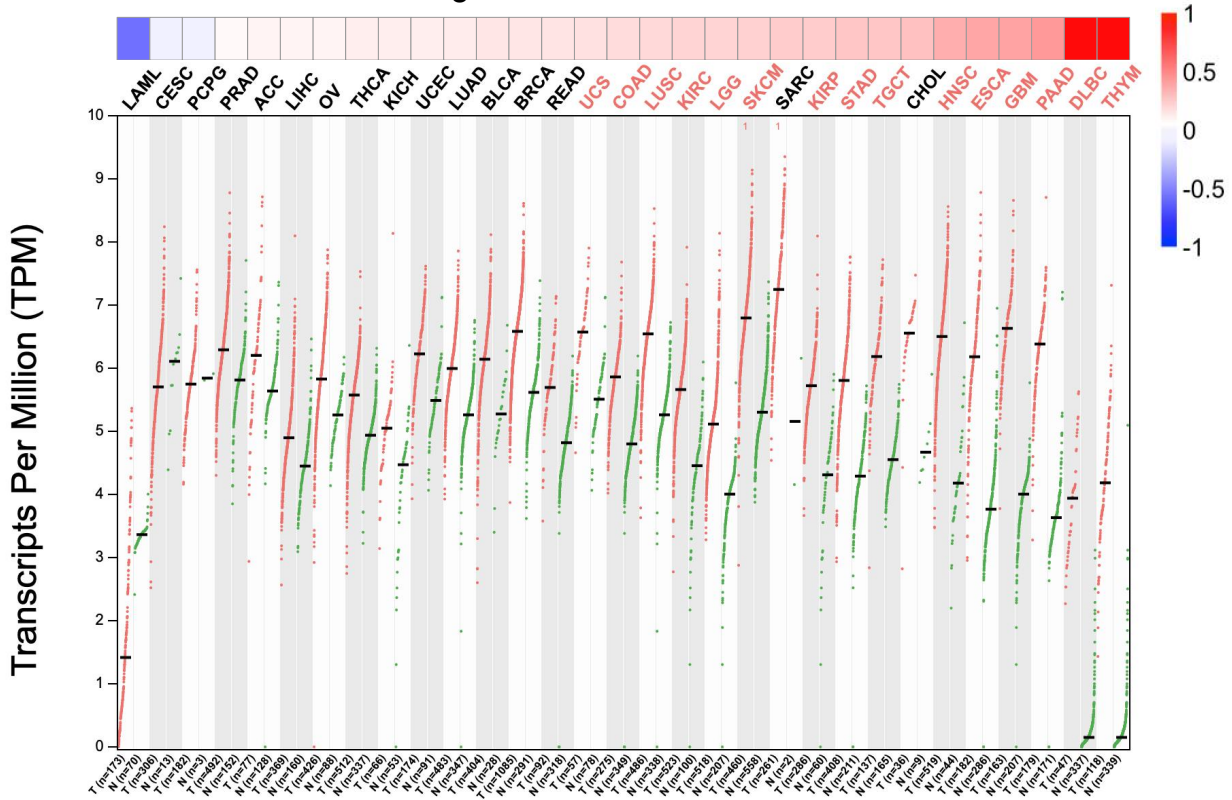

**Figure S1. B7-H3 expression analysis using GEPIA**

Expression level of B7-H3 in 9433 tumor samples and 5540 normal samples from the TCGA and the GTEx projects including 31 tumor subtypes were analyzed using GEPIA web server (<http://gepia.cancer-pku.cn>).

The upper color indicator bar indicates the expression fold changes in tumor samples compared to normal samples.

Tumor subtypes shown in red font represent statistically significant upregulation in tumor samples ( $p < 0.05$ ).



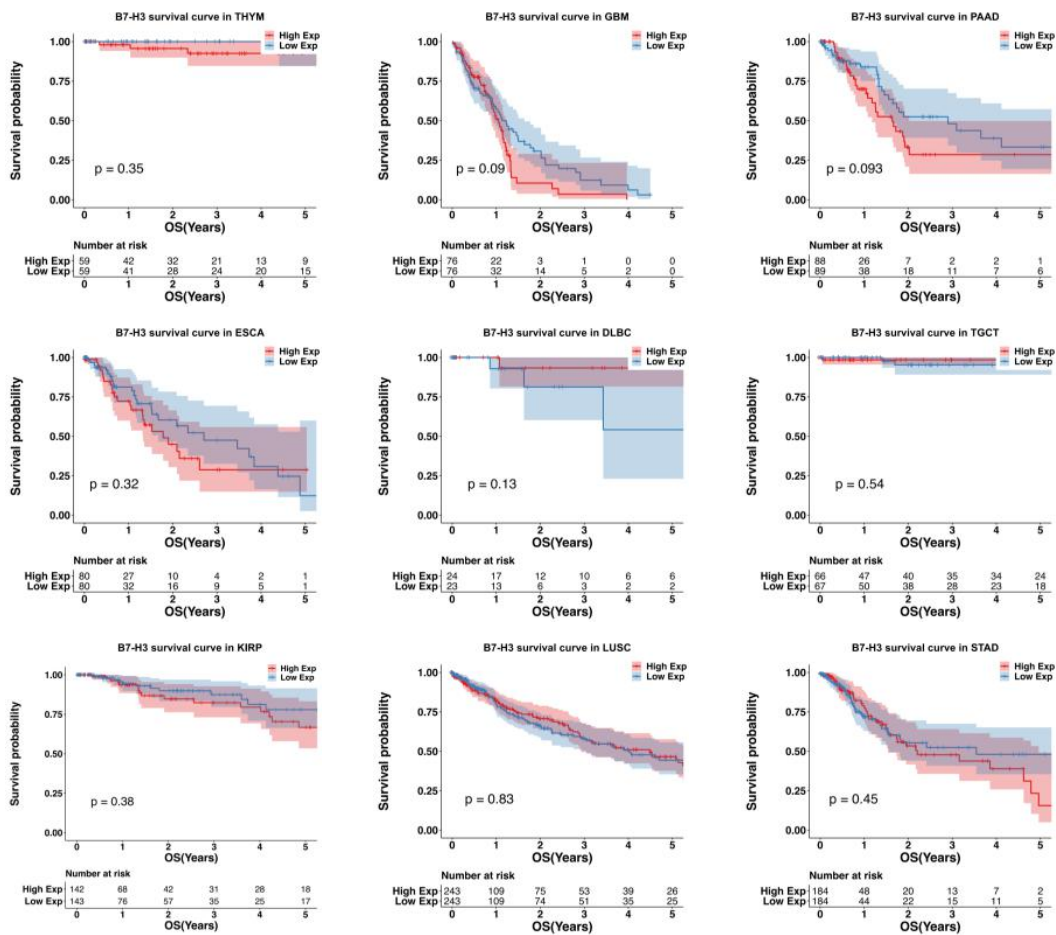

**Figure S2. Correlation analysis between B7-H3 expression and survival using GEPIA**

Correlation analysis between B7-H3 expression and survival across 9 common tumor subtypes (THYM, GBM, PAAD, ESCA, DLBC, TGCT, KIRP, LUSC and STAD) were performed by using GEPIA web server (<http://gepia.cancer-pku.cn>).

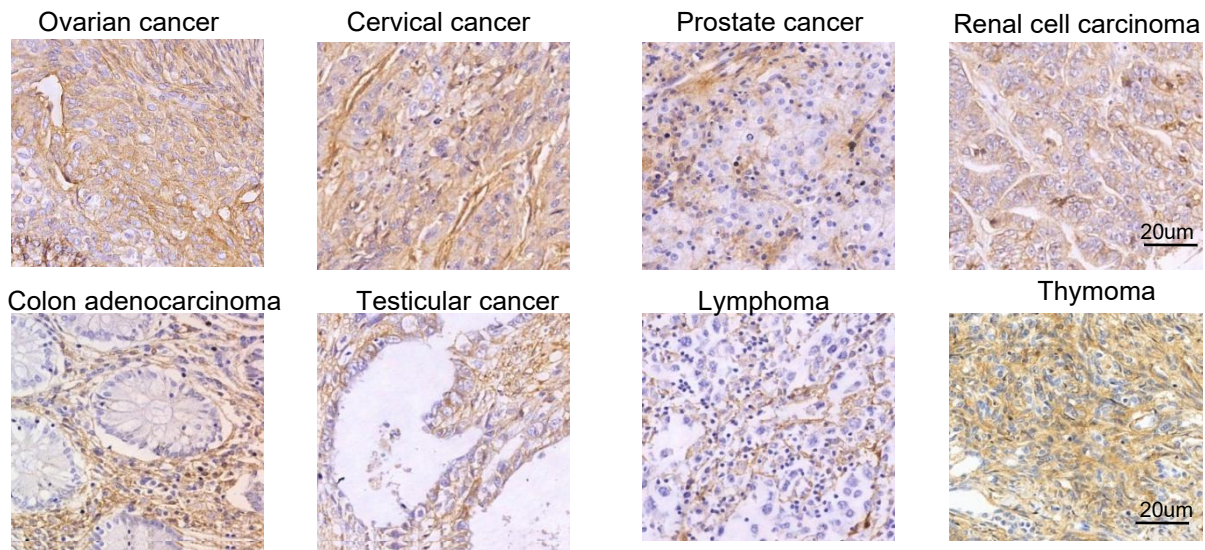

**Figure S3. IHC staining for B7-H3 expression in human tumor tissues**

Representative IHC images of B7-H3 expression in human cancer tissues including ovarian cancer, cervical cancer, prostate cancer, renal cell carcinoma, colon adenocarcinoma, testicular cancer, lymphoma and thymoma.

Scale bars, 20  $\mu$ m.

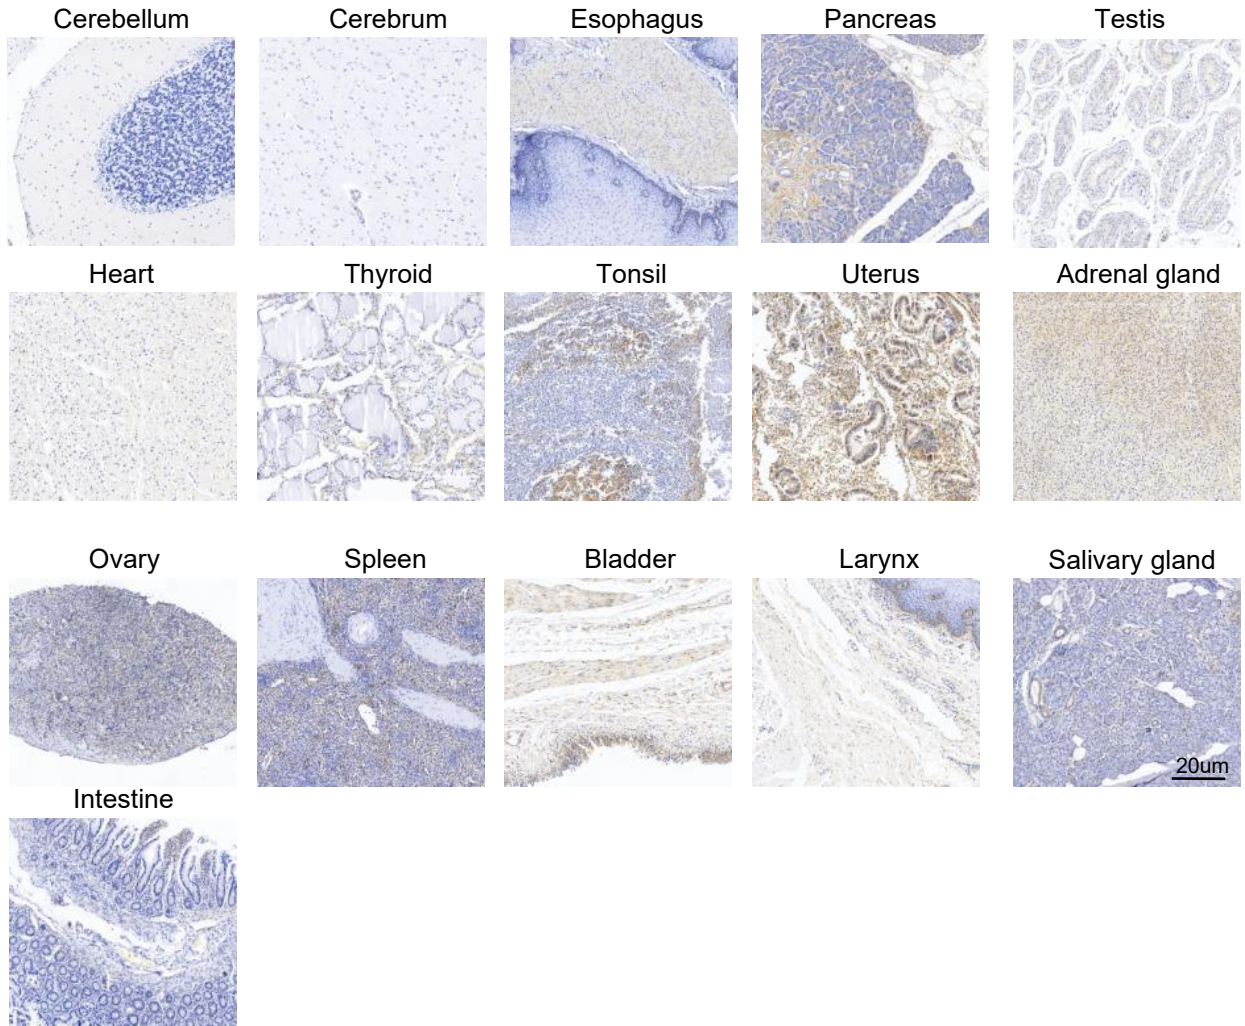

**Figure S4. IHC staining for B7-H3 expression in human normal tissues**

Representative IHC images of B7-H3 expression in human normal tissues including cerebellum, cerebrum, esophagus, pancreas, testis, heart, thyroid, tonsil, uterus, adrenal gland, ovary, spleen, bladder, larynx, salivary gland and intestine. Scale bars, 200 µm.

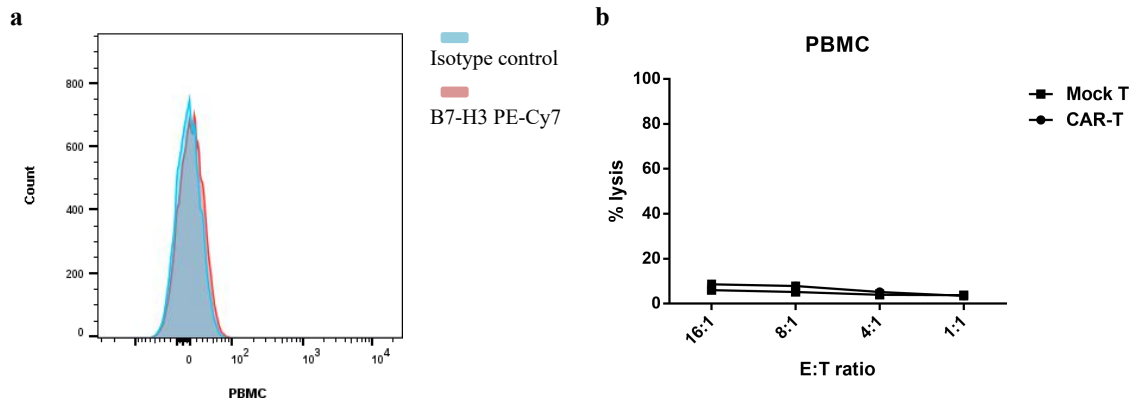

**Figure S5. Expression of B7-H3 in PBMCs and the cytotoxicity of CAR-T cells against PBMCs**

a. Expression of B7-H3 in PBMCs was evaluated by FACS. Cells were incubated with B7-H3-PE-Cy7 (purchased from BioLegend) (red) or its corresponding isotype control (blue).

b.  $^{51}\text{Cr}$ -release assay to measure the cytotoxicity of CAR-T cells against PBMCs at different E:T ratios.
